# Supplementary material for: Serum GDF-8 levels change dynamically during controlled ovarian hyperstimulation in patients undergoing IVF/ICSI-ET
Source: PubMed Central journal article supplement (PMC4916440; doi:10.1038/srep28036), 2016-06-22
Supplement: srep28036-s1.pdf [file srep28036-s1.pdf]

**Serum GDF-8 levels change dynamically during controlled ovarian hyperstimulation in patients undergoing IVF/ICSI-ET**

**Lanlan Fang, Yiping Yu, Ruizhe Zhang, Jingyan He, Ying-Pu Sun\***

Reproductive Medical Center, The First Affiliated Hospital of Zhengzhou University,  
Zhengzhou, China 450052

\*Corresponding author

**Supplementary Table 1**

|                                             | Pregnant Group<br>(n=11) | Non-pregnant Group<br>(n=8) |
|---------------------------------------------|--------------------------|-----------------------------|
| AGE                                         | 29.8±1.7                 | 30.0±1.0                    |
| BMI                                         | 21.6±0.8                 | 23.9±1.8                    |
| Number of AFC                               | 12.7±1.5                 | 14.9±1.6                    |
| Basle FSH (mIU/ml)                          | 6.7±0.5                  | 6.3±0.5                     |
| Basle LH (mIU/ml)                           | 5.4±0.5                  | 4.3±0.7                     |
| Basle E2 (pg/ml)                            | 32.5±3.4                 | 68.8±18.3                   |
| Basle P4 (ng/ml)                            | 0.6±0.1                  | 0.6±0.1                     |
| Basle T (pg/ml)                             | 0.2±0.03                 | 0.2±0.05                    |
| Basle PRL (ng/ml)                           | 19.6±2.4                 | 21.9±4.0                    |
| Total Gn days                               | 11.0±0.7                 | 11.0±0.7                    |
| Total Gn dose (ampoules)                    | 1904.5±249.5             | 1500.0±133.0                |
| Serum E2 on hCG day (pg/ml)                 | 4628.8±644.2             | 5427.8±683.2                |
| Serum P4 on hCG day (ng/ml)                 | 0.9±0.2                  | 1.0±0.2                     |
| Serum E2 on OPU day (pg/ml)                 | 2591.5±402.8             | 3575.4±749.0                |
| Serum P4 on OPU day (ng/ml)                 | 24.6±3.5                 | 22.0±5.7                    |
| P4 increase from hCG day to OPU day (ng/ml) | 23.6±3.1                 | 18.5±5.2                    |
| Number of retrieved oocyte                  | 12.5±1.8                 | 12.8±1.4                    |

BMI, body mass index; AFC, antral follicle count; FSH, follicle stimulating hormone; LH, luteinizing hormone; E2, estradiol; P4, progesterone; T, testosterone; PRL, prolactin; Gn: gonadotropin; hCG: human chorionic gonadotropin; OPU: oocyte picked-up

Data are presented as mean ± SEM

**Supplementary Table 2**

|                           | Serum GDF-8 on hCG day | GDF-8 decrease from hCG day to OPU day |
|---------------------------|------------------------|----------------------------------------|
| AUC (95% CI)              | 0.839                  | 0.778                                  |
| <i>p</i> value            | 0.028                  | 0.033                                  |
| Best cutoff point (ng/ml) | 4.7                    | 1.3                                    |
| Sensitivity (%)           | 62.5                   | 83.3                                   |
| Specificity (%)           | 100                    | 77.8                                   |
| PPV (%)                   | 100                    | 81.8                                   |
| NPV (%)                   | 57.2                   | 75                                     |

AUC: area under the curve; PPV: positive predictive value; NPV: negative predictive value

**Supplementary Table 3**

|                             | GDF-8 < 4.7 ng/ml (n=14) | GDF-8 ≥ 4.7 ng/ml (n=5) |
|-----------------------------|--------------------------|-------------------------|
| AGE                         | 30.4±0.9                 | 26.4±3.0                |
| BMI                         | 22.9±1.1                 | 21.1±1.1                |
| Number of AFC               | 13.8±1.2                 | 13.0±2.8                |
| Basle FSH (mIU/ml)          | 6.1±0.4                  | 7.3±0.7                 |
| Basle LH (mIU/ml)           | 4.3±0.4                  | 6.1±0.7                 |
| Basle E2 (pg/ml)            | 54.1±16.6                | 23.4±3.7                |
| Basle P4 (ng/ml)            | 0.6±0.1                  | 0.4±0.07                |
| Basle T (ng/ml)             | 0.2±0.04                 | 0.2±0.01                |
| Basle PRL (ng/ml)           | 21.0±2.7                 | 18.7±4.0                |
| Total Gn days               | 11.2±0.6                 | 10.0±0.9                |
| Total Gn dose (Ampoules)    | 1783.0±145.9             | 1597.5±491.9            |
| Serum E2 on hCG day (pg/ml) | 5207.4±559.5             | 4287.0±906.3            |
| Serum P4 on hCG day (ng/ml) | 1.1±0.2                  | 0.6±0.1 *               |
| Serum E2 on OPU day (pg/ml) | 3082.1±479.1             | 2693.2±613.9            |
| Serum P4 on OPU day (ng/ml) | 22.4±3.7                 | 26.5±4.7                |
| Number of retrieved oocyte  | 12.1±1.1                 | 13.8±1.9                |
| Pregnancy rate              | 42.9% (6/14)             | 100.0% (5/5) *          |

BMI, body mass index; AFC, antral follicle count; FSH, follicle stimulating hormone; LH, luteinizing hormone; E2, estradiol; P4, progesterone; T, testosterone; PRL, prolactin; Gn: gonadotropin; hCG: human chorionic gonadotropin; OPU: oocyte picked-up

Data are presented as mean ± SEM

\* $p < 0.05$  compared with GDF-8 < 4.7 ng/ml group

**Supplementary Table 4**

|                                             | GDF-8 decrease from hCG day to OPU day < 1.3 ng/ml (n=8) | GDF-8 decrease from hCG day to OPU day $\geq$ 1.3ng/ml (n=11) |
|---------------------------------------------|----------------------------------------------------------|---------------------------------------------------------------|
| AGE                                         | 28.8 $\pm$ 0.9                                           | 29.6 $\pm$ 1.7                                                |
| BMI                                         | 22.2 $\pm$ 1.6                                           | 22.6 $\pm$ 1.1                                                |
| Number of AFC                               | 15.7 $\pm$ 1.3                                           | 12.1 $\pm$ 1.5                                                |
| Basle FSH (mIU/ml)                          | 6.4 $\pm$ 0.5                                            | 6.4 $\pm$ 0.5                                                 |
| Basle LH (mIU/ml)                           | 4.3 $\pm$ 0.6                                            | 6.1 $\pm$ 0.4                                                 |
| Basle E2 (pg/ml)                            | 30.7 $\pm$ 6.6                                           | 57.1 $\pm$ 8.6                                                |
| Basle P4 (ng/ml)                            | 0.5 $\pm$ 0.07                                           | 0.6 $\pm$ 0.03                                                |
| Basle T (ng/ml)                             | 0.2 $\pm$ 0.04                                           | 0.2 $\pm$ 0.03                                                |
| Basle PRL (ng/ml)                           | 23.5 $\pm$ 4.3                                           | 18.2 $\pm$ 2.6                                                |
| Total Gn days                               | 11.2 $\pm$ 0.7                                           | 10.7 $\pm$ 0.6                                                |
| Total Gn dose (Ampoules)                    | 1537.0 $\pm$ 142.8                                       | 1877.5 $\pm$ 250.9                                            |
| Serum E2 on hCG day (pg/ml)                 | 5837.4 $\pm$ 581.6                                       | 4330.8 $\pm$ 641.8                                            |
| Serum P4 on hCG day (ng/ml)                 | 1.2 $\pm$ 0.2                                            | 0.8 $\pm$ 0.2                                                 |
| Serum E2 on OPU day (pg/ml)                 | 3525.4 $\pm$ 694.6                                       | 2623.3 $\pm$ 414.8                                            |
| Serum P4 on OPU day (ng/ml)                 | 18.9 $\pm$ 3.6                                           | 26.5 $\pm$ 4.1                                                |
| P4 increase from hCG day to OPU day (ng/ml) | 15.5 $\pm$ 4.0                                           | 25.7 $\pm$ 4.0 *                                              |
| Number of retrieved oocyte                  | 12.3 $\pm$ 1.3                                           | 12.8 $\pm$ 1.8                                                |
| Pregnancy rate                              | 25.0% (2/8)                                              | 81.8% (9/11) *                                                |

BMI, body mass index; AFC, antral follicle count; FSH, follicle stimulating hormone; LH, luteinizing hormone; E2, estradiol; P4, progesterone; T, testosterone; PRL, prolactin; Gn: gonadotropin; hCG: human chorionic gonadotropin; OPU: oocyte picked-up

Data are presented as mean  $\pm$  SEM

\* $p < 0.05$  compared with GDF-8 decrease from hCG day to OPU day < 1.3 ng/ml group
